# Supplementary material for: Disparities in sleep duration among American children: effects of race and ethnicity, income, age, and sex
Source: PubMed Central journal article supplement — Proc Natl Acad Sci U S A. 2022 Jul 18;119(30):e2120009119. doi: 10.1073/pnas.2120009119 (PMC9335336; doi:10.1073/pnas.2120009119), 2022-07-18
Supplement: pnas.2120009119.sapp.pdf [file pnas.2120009119.sapp.pdf]

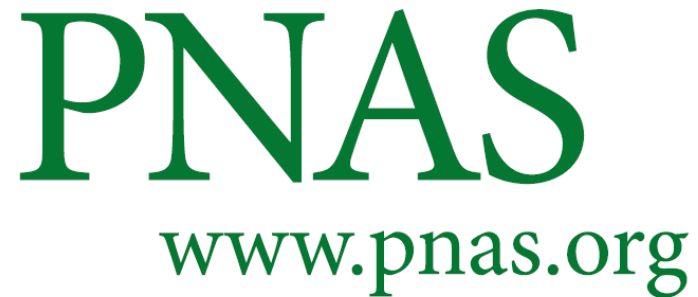

## Supplementary Information for

Disparities in Sleep Duration Among American Children: Effects of Race, Ethnicity, Income, and Sex

Natasha T. Giddens M.D.<sup>1</sup>, Paul Juneau M.S.<sup>2</sup>, Peter Manza PhD<sup>1</sup>, [Corinde E. Wiers<sup>1,3</sup>](#), Nora D. Volkow M.D.<sup>1</sup>

### Address correspondence to:

Natasha T. Giddens, MD, MS,

Laboratory of Neuroimaging, National Institute on Alcohol Abuse and Alcoholism, National Institutes of Health, 10 Center Drive, Bethesda, MD 20892-1013, USA

Email : [natasha.giddens@nih.gov](mailto:natasha.giddens@nih.gov)

Nora D Volkow, MD

Laboratory of Neuroimaging, National Institute on Alcohol Abuse and Alcoholism, National Institutes of Health, 10 Center Drive, Bethesda, MD 20892-1013, USA

[nvolkow@nida.nih.gov](mailto:nvolkow@nida.nih.gov)

**Supplement Table 1:** Number of children with reported actigraphy measurements each month by race/ethnicity.

|                 | Jan | Feb | Mar | April | May | June | July | Aug | Sep | Oct | Nov | Dec |
|-----------------|-----|-----|-----|-------|-----|------|------|-----|-----|-----|-----|-----|
| <b>Asian</b>    | 10  | 11  | 10  | 8     | 3   | 13   | 6    | 8   | 8   | 12  | 11  | 11  |
| <b>Black</b>    | 31  | 44  | 24  | 23    | 14  | 18   | 27   | 40  | 20  | 38  | 40  | 34  |
| <b>Hispanic</b> | 84  | 115 | 72  | 58    | 45  | 46   | 52   | 77  | 52  | 55  | 65  | 90  |
| <b>Other</b>    | 45  | 34  | 37  | 29    | 27  | 30   | 20   | 32  | 37  | 30  | 47  | 48  |
| <b>White</b>    | 255 | 298 | 257 | 147   | 130 | 168  | 206  | 240 | 156 | 185 | 234 | 240 |
| <b>Total</b>    | 425 | 502 | 400 | 265   | 219 | 275  | 311  | 397 | 273 | 320 | 397 | 423 |

**Supplement Table 2:** Number of children with reported actigraphy measurements each month by Income Categories.

|                      | Jan | Feb | Mar | April | May | June | July | Aug | Sep | Oct | Nov | Dec |
|----------------------|-----|-----|-----|-------|-----|------|------|-----|-----|-----|-----|-----|
| <b>DNK/RTA</b>       | 28  | 37  | 28  | 16    | 15  | 15   | 18   | 24  | 23  | 27  | 25  | 16  |
| <b>Low-Income</b>    | 81  | 101 | 77  | 62    | 38  | 51   | 60   | 82  | 62  | 72  | 94  | 95  |
| <b>Middle-Income</b> | 119 | 153 | 121 | 67    | 66  | 67   | 83   | 97  | 66  | 88  | 108 | 126 |
| <b>High-Income</b>   | 197 | 211 | 174 | 120   | 100 | 142  | 150  | 194 | 122 | 133 | 170 | 186 |
| <b>Total</b>         | 425 | 502 | 400 | 265   | 219 | 275  | 311  | 397 | 273 | 320 | 397 | 423 |

**Supplement Table 3:** Supplemental Models, variables, assessment tools, ABCD data dictionary search terms and significance

| Model | Variables              | Assessment Tool                         | Short Name   | Element Name                                                 | p=      |
|-------|------------------------|-----------------------------------------|--------------|--------------------------------------------------------------|---------|
| 2     | Area Deprivation Index | Residential History Derived Scores      | abcd_rhds01  | reshist_addr1_adi_wsum                                       | 0.2219  |
| 3     | Age parent had child   | ABCD Parent Demographics Survey         | pdem02       | demo_prnt_age_v2_l                                           | 0.8516  |
| 4     | Discrimination         | ABCD Youth Discrimination Measure       | abcd_ydmes01 | dim_yesno_q1<br>dim_yesno_q2<br>dim_yesno_q3<br>dim_yesno_q4 | 0.8019  |
| 5     | Time Child Fell Asleep | ABCD Youth Fitbit Daily Sleep Summaries | abcd_fbdss01 | fit_ss_first_sleep_minutes                                   | <0.0001 |
| 6     | BMI                    | ABCD Youth Anthropometrics              | abcd_ant01   | Anthroheightcalc<br>anthroweightcalc                         | <0.0001 |

**Supplement Table 4.** Main model results: Summary of average TST for each Race/Ethnicity and Income category level  
**Note:** Cohen's d is calculated using White Race/Ethnicity as reference for Race/Ethnicity categories and High-income for Income Categories

\*DNK/RTA=Do not know/Refused to answer

| Variable          | N    | Mean TST | Std Dev | Lower 95% Mean | Upper 95% Mean | Cohen's d |
|-------------------|------|----------|---------|----------------|----------------|-----------|
| race_ethnicity    |      |          |         |                |                |           |
| Asian             | 111  | 441.55   | 38.44   | 433.92         | 448.38         | -0.37     |
| Black             | 353  | 420.87   | 42.21   | 416.45         | 425.29         | -0.95     |
| Hispanic          | 811  | 445.15   | 36.11   | 442.66         | 447.12         | -0.26     |
| Other             | 416  | 444.16   | 36.15   | 440.67         | 447.64         | -0.29     |
| White             | 2516 | 454.14   | 33.95   | 452.82         | 455.47         |           |
| Income Categories |      |          |         |                |                |           |
| Low-Income        | 875  | 438.14   | 41.15   | 435.41         | 440.87         | -0.44     |
| Middle-Income     | 1161 | 447.67   | 36.41   | 445.57         | 449.76         | -0.18     |
| DNK/RTA*          | 272  | 444.90   | 37.29   | 440.45         | 449.35         | -0.26     |
| High-Income       | 1899 | 453.83   | 33.37   | 452.33         | 455.34         |           |

**Supplement Table 4 continued:** Main model results: Summary of average TST for the interaction between Race/Ethnicity and Income Category Levels. **Note:** Cohen's d is calculated using White race/ethnicity as the reference group within each income category. Cohen's d' uses White High-Income as the reference for interactions between every other Race/Ethnicity\* Income Category

| Variable              | N    | Mean TST | Std Dev | Lower 95% Mean | Upper 95% Mean | Cohen's d | Cohen's d' |
|-----------------------|------|----------|---------|----------------|----------------|-----------|------------|
| Race/Ethnicity*Income |      |          |         |                |                |           |            |
| Low-Income            |      |          |         |                |                |           |            |
| Asian                 | 9    | 439.06   | 48.15   | 402.05         | 476.07         | -0.22     | -0.51      |
| Black                 | 190  | 416.31   | 44.16   | 409.99         | 422.63         | -0.77     | -1.15      |
| Hispanic              | 340  | 444.59   | 37.20   | 440.62         | 448.55         | -0.07     | -0.34      |
| Other                 | 95   | 435.48   | 42.80   | 426.76         | 444.20         | -0.31     | -0.61      |
| White                 | 241  | 447.27   | 36.87   | 442.59         | 451.95         | 0.00      | -0.26      |
| Middle-Income         |      |          |         |                |                |           |            |
| Asian                 | 27   | 441.92   | 45.16   | 424.06         | 459.79         | -0.31     | -0.42      |
| Black                 | 81   | 420.52   | 36.81   | 412.38         | 428.66         | -0.92     | -1.07      |
| Hispanic              | 229  | 441.57   | 34.12   | 437.13         | 446.01         | -0.33     | -0.44      |
| Other                 | 98   | 446.34   | 36.98   | 438.92         | 453.75         | -0.19     | -0.29      |
| White                 | 726  | 453.02   | 35.00   | 450.47         | 455.56         | 0.00      | -0.09      |
| High-Income           |      |          |         |                |                |           |            |
| Asian                 | 59   | 444.26   | 30.02   | 436.43         | 452.08         | -0.36     | -0.36      |
| Black                 | 46   | 435.46   | 43.76   | 422.46         | 448.45         | -0.62     | -0.62      |
| Hispanic              | 168  | 447.24   | 35.95   | 441.77         | 452.72         | -0.26     | -0.26      |
| Other                 | 189  | 450.91   | 30.15   | 446.58         | 455.23         | -0.16     | -0.16      |
| White                 | 1437 | 455.97   | 32.87   | 454.27         | 457.67         | 0.00      | 0.00       |
| DNK or RTA            |      |          |         |                |                |           |            |
| Asian                 | 16   | 429.61   | 48.96   | 403.52         | 455.70         | -0.67     | -0.80      |
| Black                 | 36   | 427.16   | 37.45   | 414.48         | 439.83         | -0.77     | -0.87      |
| Hispanic              | 74   | 454.10   | 36.32   | 445.69         | 462.52         | 0.04      | -0.06      |
| Other                 | 34   | 424.58   | 33.70   | 445.69         | 462.52         | -0.87     | -0.95      |
| White                 | 112  | 452.88   | 32.25   | 446.84         | 458.92         | 0.00      | -0.09      |

**Supplement Table 4 continued:** Main model results: Summary of average TST age and sex with 13yr/age and Female as reference Levels.

| Variable       | N    | Mean TST | Std Dev | Lower 95% Mean | Upper 95% Mean | Cohen's d |
|----------------|------|----------|---------|----------------|----------------|-----------|
| Age Categories |      |          |         |                |                |           |
| 9 yr/age       | 23   | 473.12   | 31.12   | 459.66         | 486.57         | 0.91      |
| 10 yr/age      | 256  | 456.21   | 33.91   | 452.03         | 460.38         | 0.43      |
| 11 yr/age      | 1891 | 451.86   | 35.89   | 450.24         | 453.47         | 0.29      |
| 12 yr/age      | 1819 | 443.97   | 37.40   | 442.25         | 445.69         | 0.07      |
| 13 yr/age      | 218  | 441.50   | 35.27   | 436.80         | 446.21         | 0.00      |
| Sex            |      |          |         |                |                |           |
| M              | 2127 | 444.99   | 36.39   | 443.44         | 446.54         | -0.18     |
| F              | 2080 | 451.66   | 36.68   | 450.09         | 453.24         | 0.00      |

**Supplement Table 4A:** Cohen's d Effect Size Ranges

| Cohen's d Value | Magnitude  |
|-----------------|------------|
| 0.1             | Very Small |
| 0.2             | Small      |
| 0.5             | Medium     |
| 0.8             | Large      |
| 1.2             | Very Large |
| 2.0             | Huge       |

**Supplement Table 5:** Results of Main Model/Model 1 with each subsequent model incorporating other potential variables driving racial/ethnic and income differences in TST

Note: Models 2-6 were run with an additional variable, and the variable’s interaction with Race/Ethnicity and with Income. All additional models controlled for sex, age, race, and income.

Model 2: Main Model + Area Deprivation Index.

Model 3: Main Model + Age of Parent at Child’s Birth

Model 4: Main Model + Discrimination based on 4 questions (Binary Yes/No). Categories: 0= No Discrimination, 1+= Experienced Discrimination

Model 5: Main Model + Time Child Fell Asleep

Model 6: Main Model + BMI

R/E\*=Race/Ethnicity

ADI\*\*= Area Deprivation Index

Parent Age\*\*\*= Age of the parent when child was born

BMI\*\*\*\*=Body Mass Index: weight (lb) / [height (in)]<sup>2</sup> x 703

|                    |                | Model 2 |                   | Model 3 |                        | Model 4 |                         | Model 5 |            | Model 6 |  |
|--------------------|----------------|---------|-------------------|---------|------------------------|---------|-------------------------|---------|------------|---------|--|
|                    |                | p-value |                   | p-value |                        | p-value |                         | p-value |            | p-value |  |
| <b>Variable</b>    | Race/Ethnicity | <0.0001 |                   | <0.0001 |                        | <0.0001 |                         | <0.0001 |            | <0.0001 |  |
|                    | Income         | <0.0001 |                   | <0.0001 |                        | <0.0001 |                         | 0.0183  |            | <0.0001 |  |
|                    | Sex            | <0.0001 |                   | <0.0001 |                        | <0.0001 |                         | <0.0001 |            | <0.0001 |  |
|                    | Age            | <0.0001 |                   | <0.0001 |                        | <0.0001 |                         | <0.0001 |            | <0.0001 |  |
|                    | ADI**          | 0.0136  | Parent Age***     | 0.7453  | Discrimination         | 0.3006  | Time Fell Asleep        | <0.0001 | BMI***     | <0.0001 |  |
| <b>Interaction</b> | R/E*ADI        | 0.3521  | R/E* Parent Age   | 0.2381  | R/E* Discrimination    | 0.0887  | R/E*Time Fell Asleep    | 0.0115  | R/E*BMI    | 0.5696  |  |
|                    | Income*ADI     | 0.3720  | Income*Parent Age | 0.1689  | Income* Discrimination | 0.2168  | Income*Time Fell Asleep | 0.0031  | Income*BMI | 0.2240  |  |

**Supplement Table 6:** Parameter Estimates of Interactions between Area Deprivation Index (ADI) and Income and Race/Ethnicity

| Term                                                       | Estimate  | Std Error | t Ratio | Prob> t |
|------------------------------------------------------------|-----------|-----------|---------|---------|
| Intercept                                                  | 545.58764 | 9.679159  | 56.37   | <.0001* |
| sex of Race Only[F]                                        | 3.7678611 | 0.544997  | 6.91    | <.0001* |
| Race/Ethnicity[Asian]                                      | -4.837725 | 3.335012  | -1.45   | 0.1470  |
| Race/Ethnicity[Black]                                      | -16.00831 | 1.971609  | -8.12   | <.0001* |
| Race/Ethnicity[Hispanic]                                   | 5.1438438 | 1.433953  | 3.59    | 0.0003* |
| Race/Ethnicity[Other]                                      | 3.6868262 | 1.699454  | 2.17    | 0.0301* |
| interview_age of pre-COVID 4207                            | -0.682401 | 0.064783  | -10.53  | <.0001* |
| reshist_addr1_adi_wsum                                     | -0.085153 | 0.034505  | -2.47   | 0.0136* |
| Income Categories[Low]                                     | -4.665496 | 1.268889  | -3.68   | 0.0002* |
| Income Categories[Middle]                                  | 0.4099094 | 1.062983  | 0.39    | 0.6998  |
| Income Categories[High]                                    | 4.077689  | 0.999439  | 4.08    | <.0001* |
| (reshist_addr1_adi_wsum-89.5493)*Income Categories[Low]    | 0.0643297 | 0.056388  | 1.14    | 0.2540  |
| (reshist_addr1_adi_wsum-89.5493)*Income Categories[Middle] | -0.081351 | 0.049084  | -1.66   | 0.0975  |
| (reshist_addr1_adi_wsum-89.5493)*Income Categories[High]   | 0.008714  | 0.039243  | 0.22    | 0.8243  |
| Race/Ethnicity[Asian]*(reshist_addr1_adi_wsum-89.5493)     | -0.030661 | 0.080589  | -0.38   | 0.7036  |
| Race/Ethnicity[Black]*(reshist_addr1_adi_wsum-89.5493)     | -0.089091 | 0.068603  | -1.30   | 0.1941  |
| Race/Ethnicity[Hispanic]*(reshist_addr1_adi_wsum-89.5493)  | 0.079755  | 0.055307  | 1.44    | 0.1494  |
| Race/Ethnicity[Other]*(reshist_addr1_adi_wsum-89.5493)     | 0.0511038 | 0.056032  | 0.91    | 0.3618  |



**Mean Fall Asleep Time (hh:mm) vs. Income**

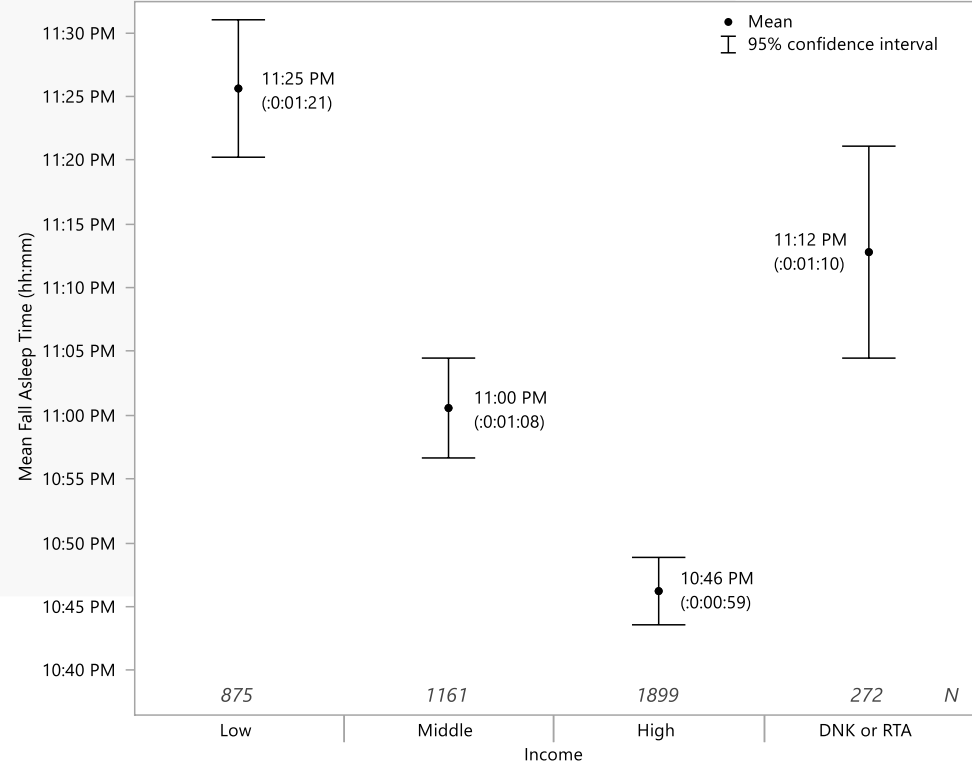

**Mean Fall Alseep Time (hh:mm) vs. Race/Ethnicity**

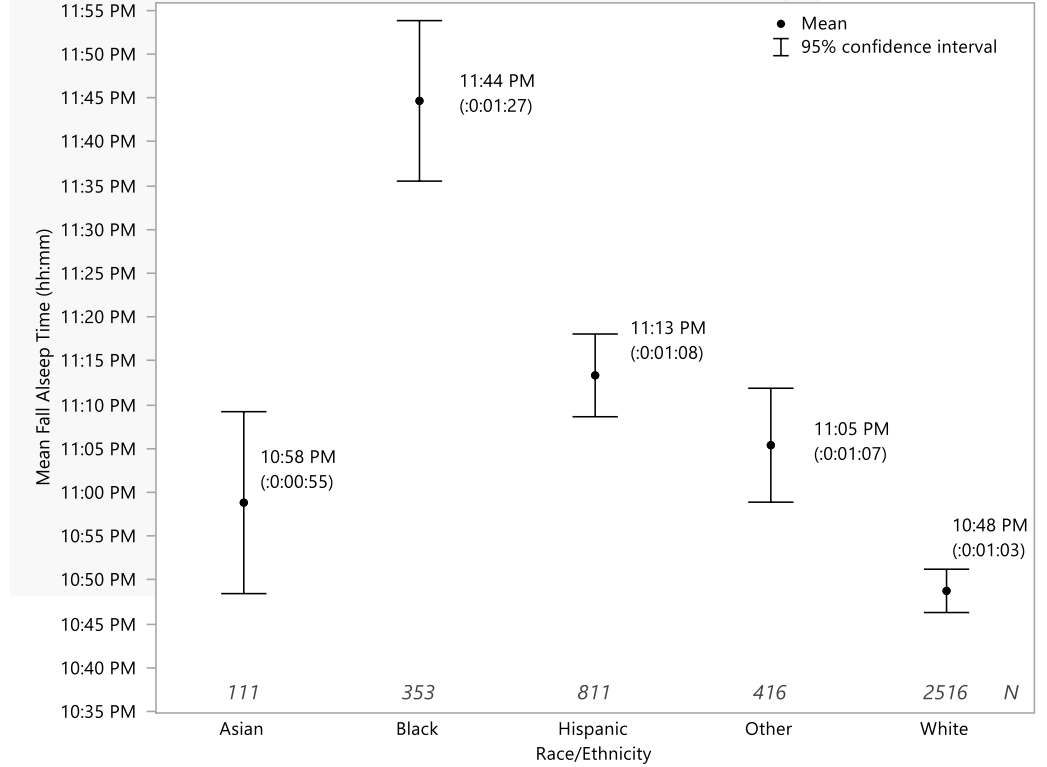

Each error bar is constructed using a 95% confidence interval.

Each error bar is constructed using a 95% confidence interval.

**Supplement Figure 1.** Average time the child fell asleep at night as a function of (A) Income and (B) Race/Ethnicity.

| Source                                          | LogWorth | PValue  |
|-------------------------------------------------|----------|---------|
| Race/Ethnicity                                  | 36.801   | 0.00000 |
| Fall asleep hour and fraction                   | 16.073   | 0.00000 |
| Income Categories                               | 4.057    | 0.00009 |
| Fall asleep hour and fraction*Income Categories | 2.816    | 0.00153 |
| Fall asleep hour and fraction*Race/Ethnicity    | 1.964    | 0.01086 |

**Supplement Figure 2:** Mediation Analysis demonstrating the fraction of selected variables contributions to TST. Figure illustrates the relative contribution of listed variables and their interactions to differences in TST. Log Worth indicates relative size of the effect between sources.

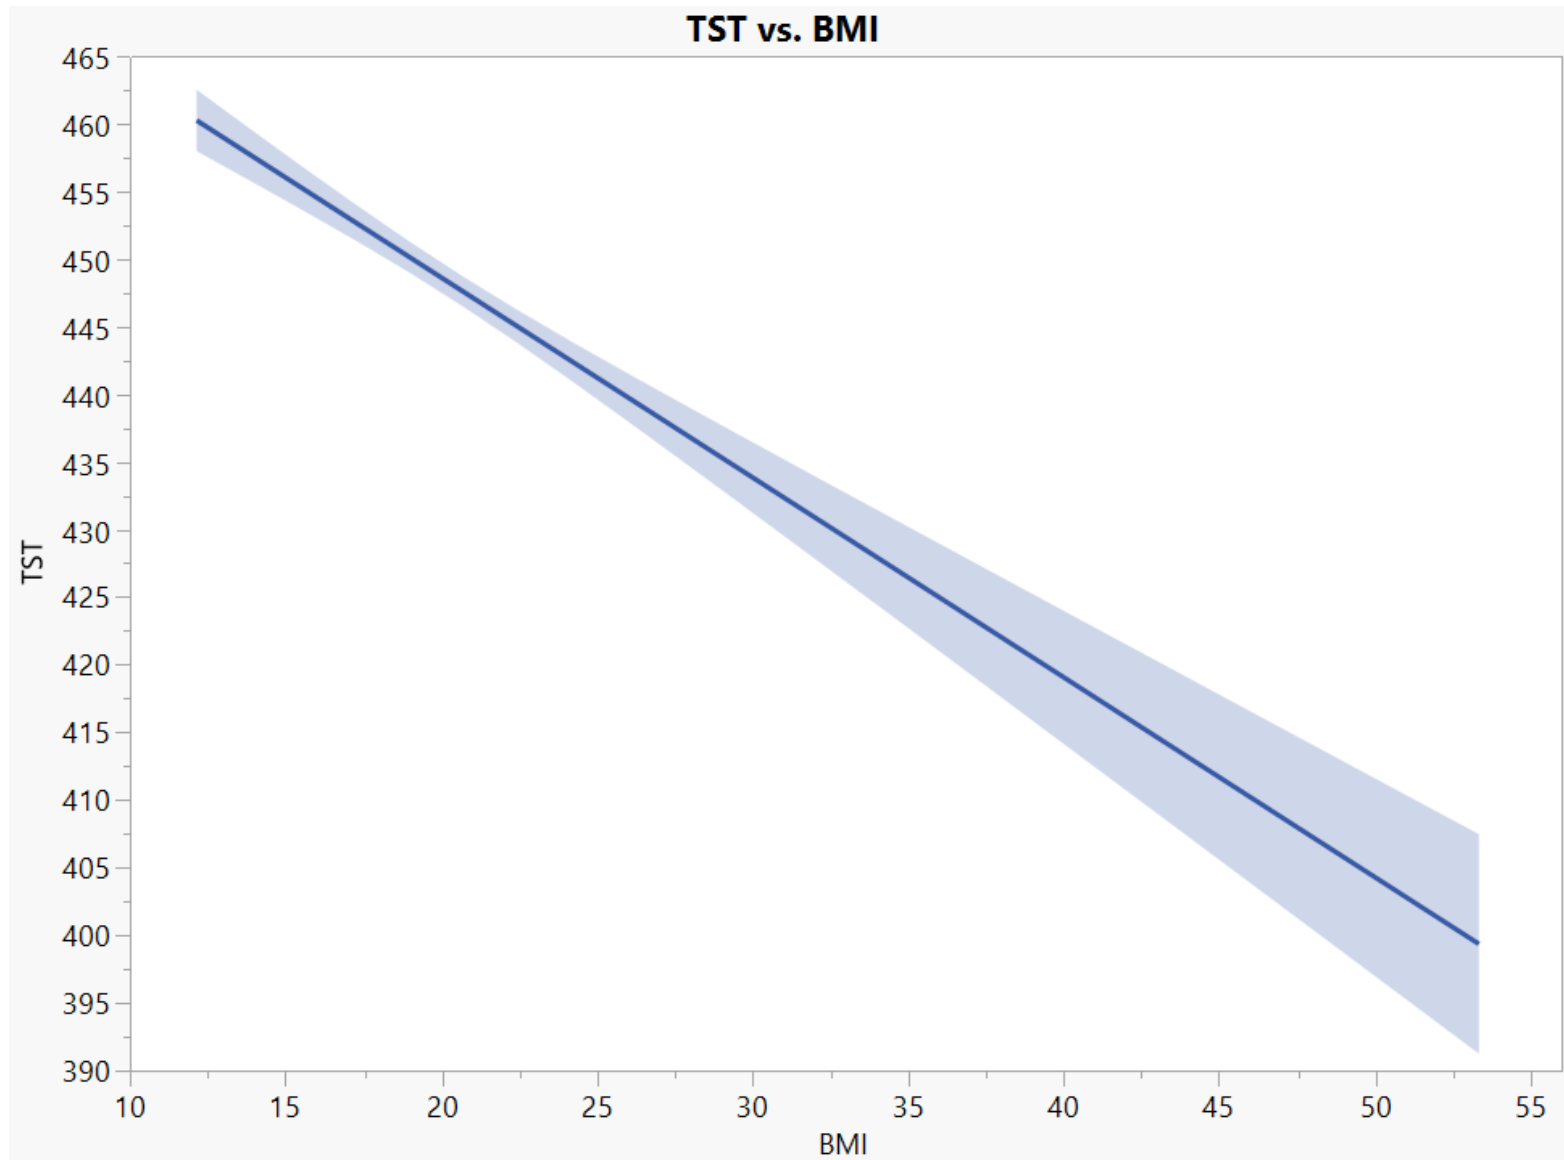

**Supplement Figure 3:** Regression line demonstrating Children with higher BMI experience less TST

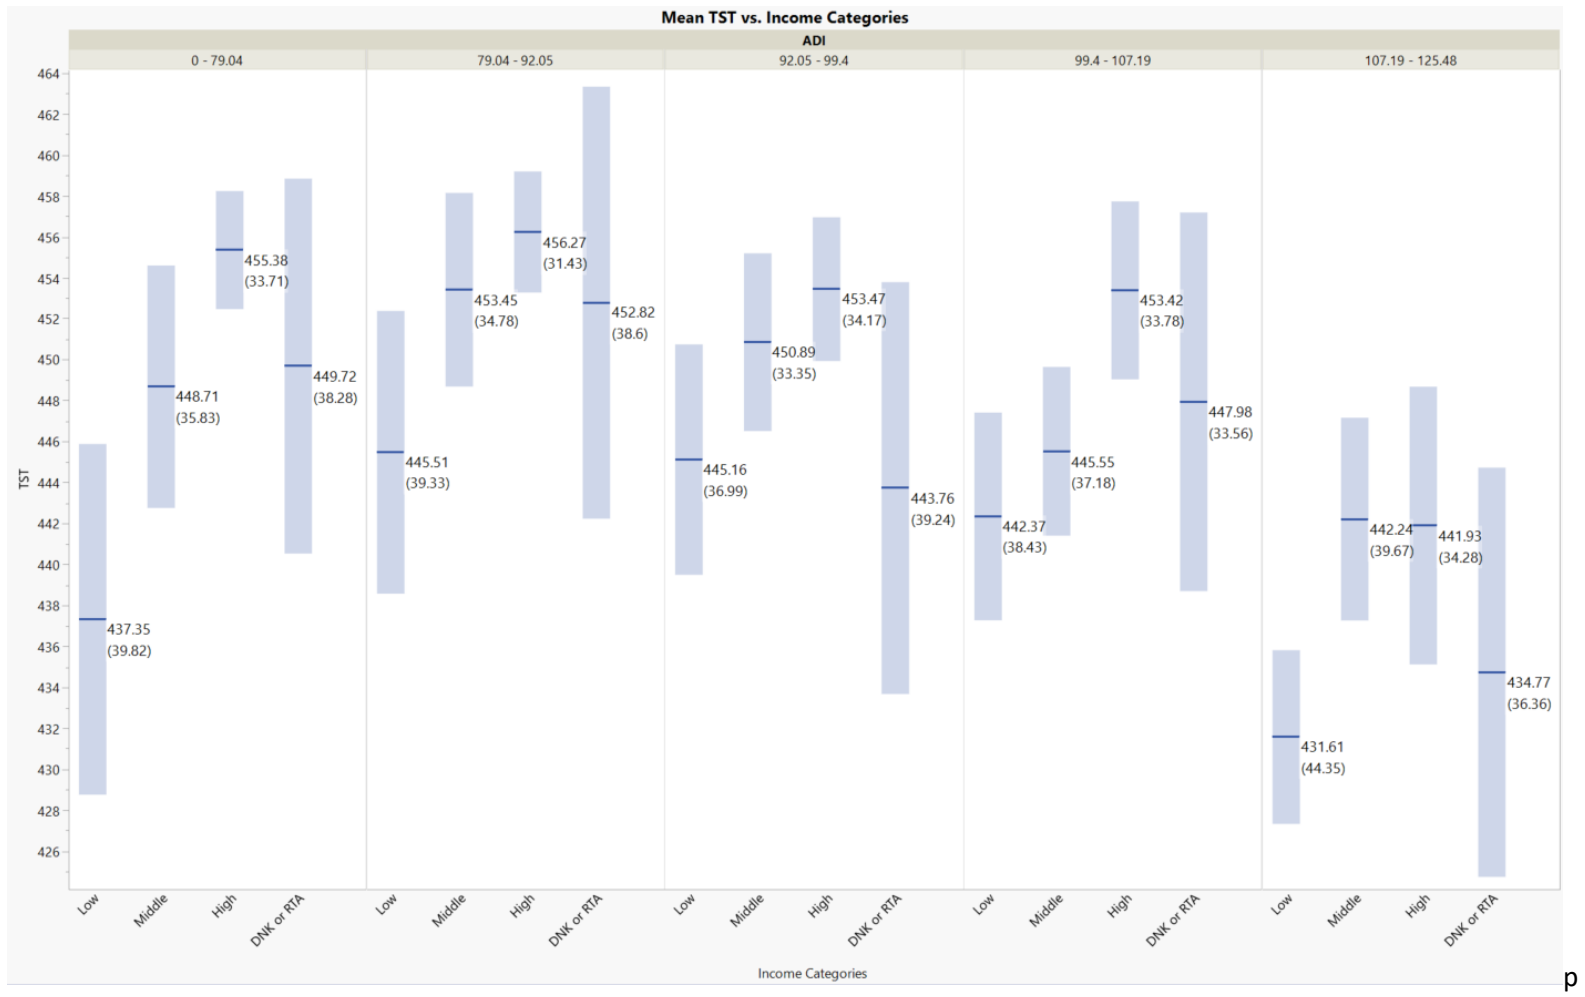

p

**Supplement Figure 4: Mean TST (SD)\* summarized by Income Categories within five ranges of Area Deprivation Index**

\*Vertical rectangles depict mean( $\pm$  SD) and confidence interval.

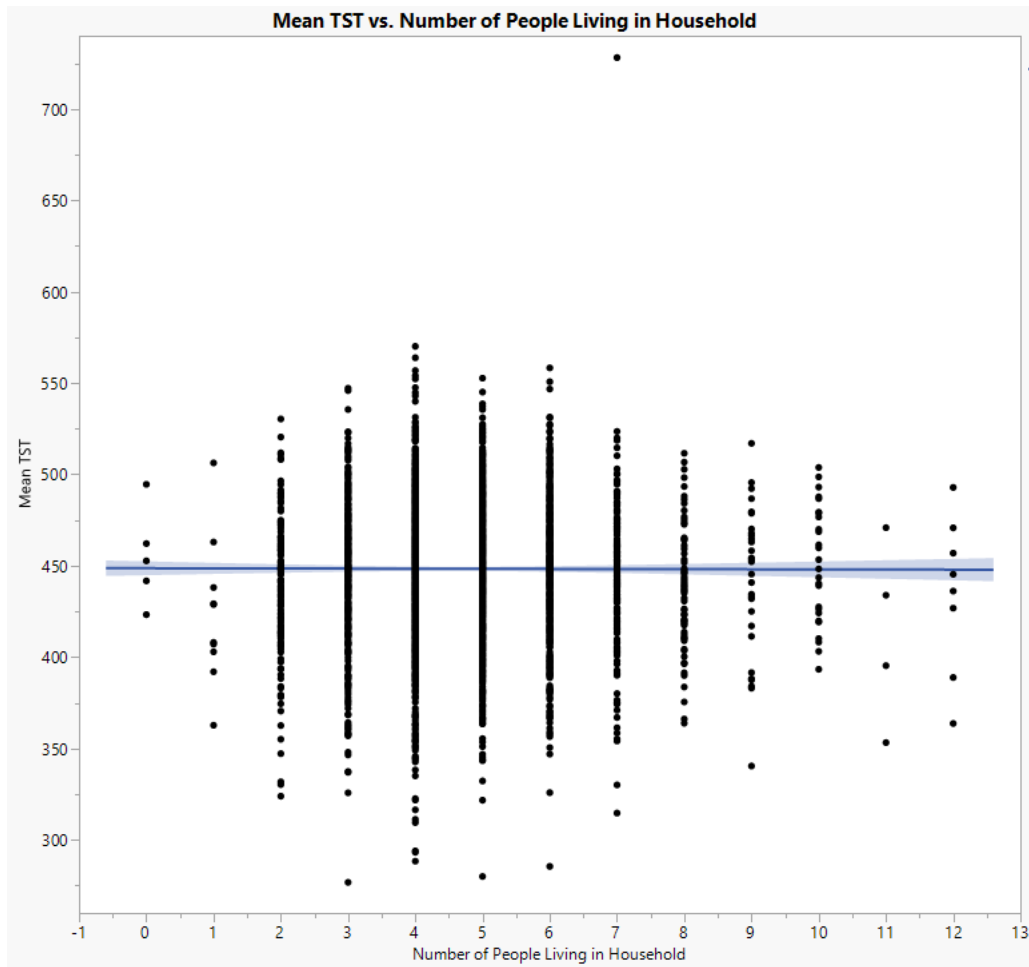

**Supplement Figure 5:** No significant association between Number of people living in same household and TST.

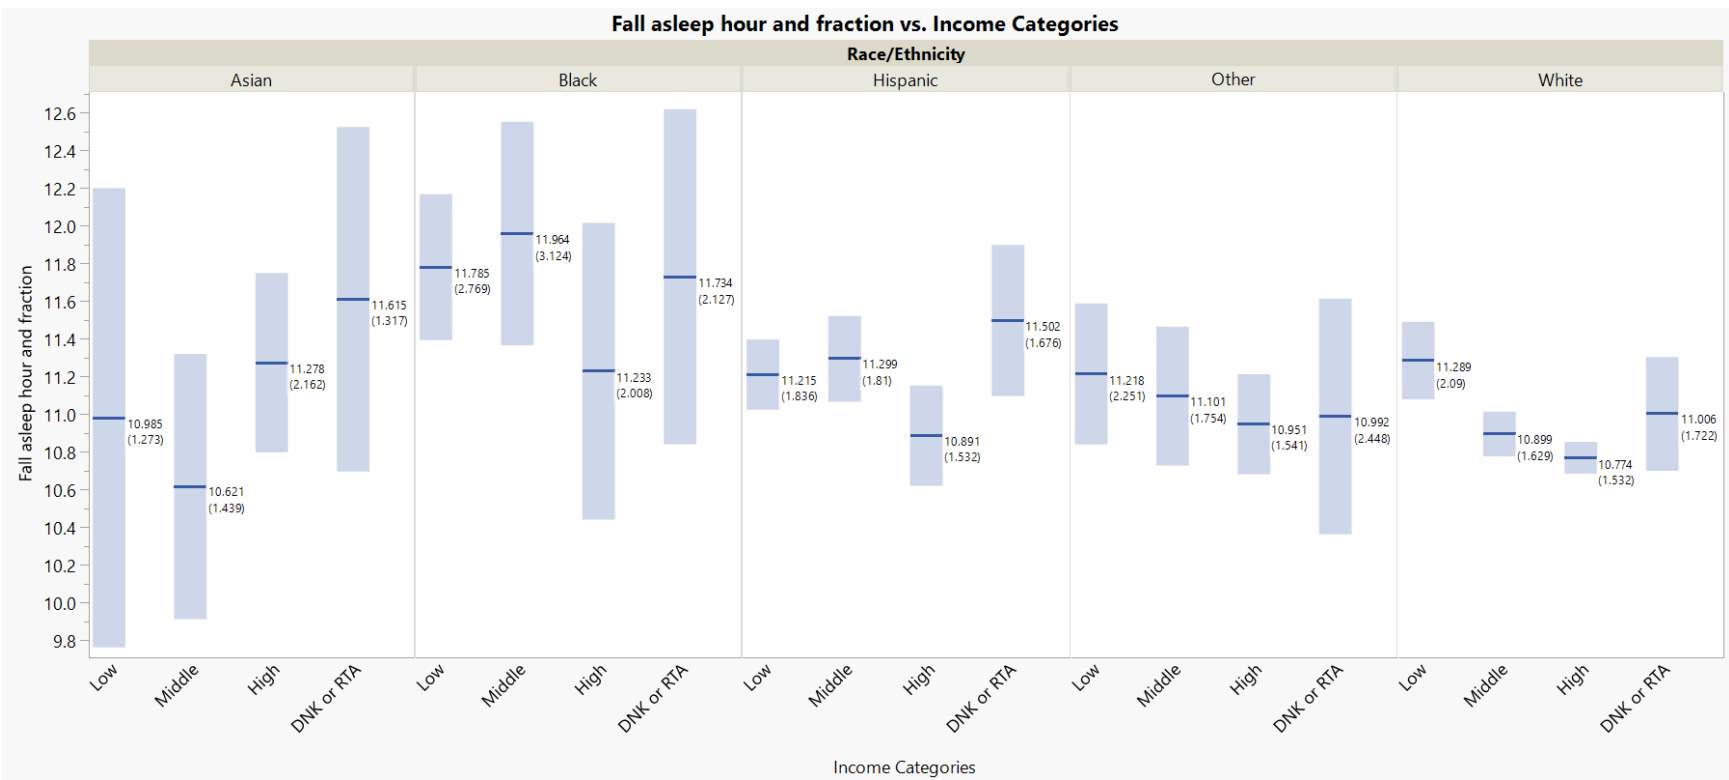

**Supplement Figure 6:** The effects of Income on time the child went to bed across Racial and Ethnic groups.

\*Vertical rectangles depict mean  $\pm$  SD

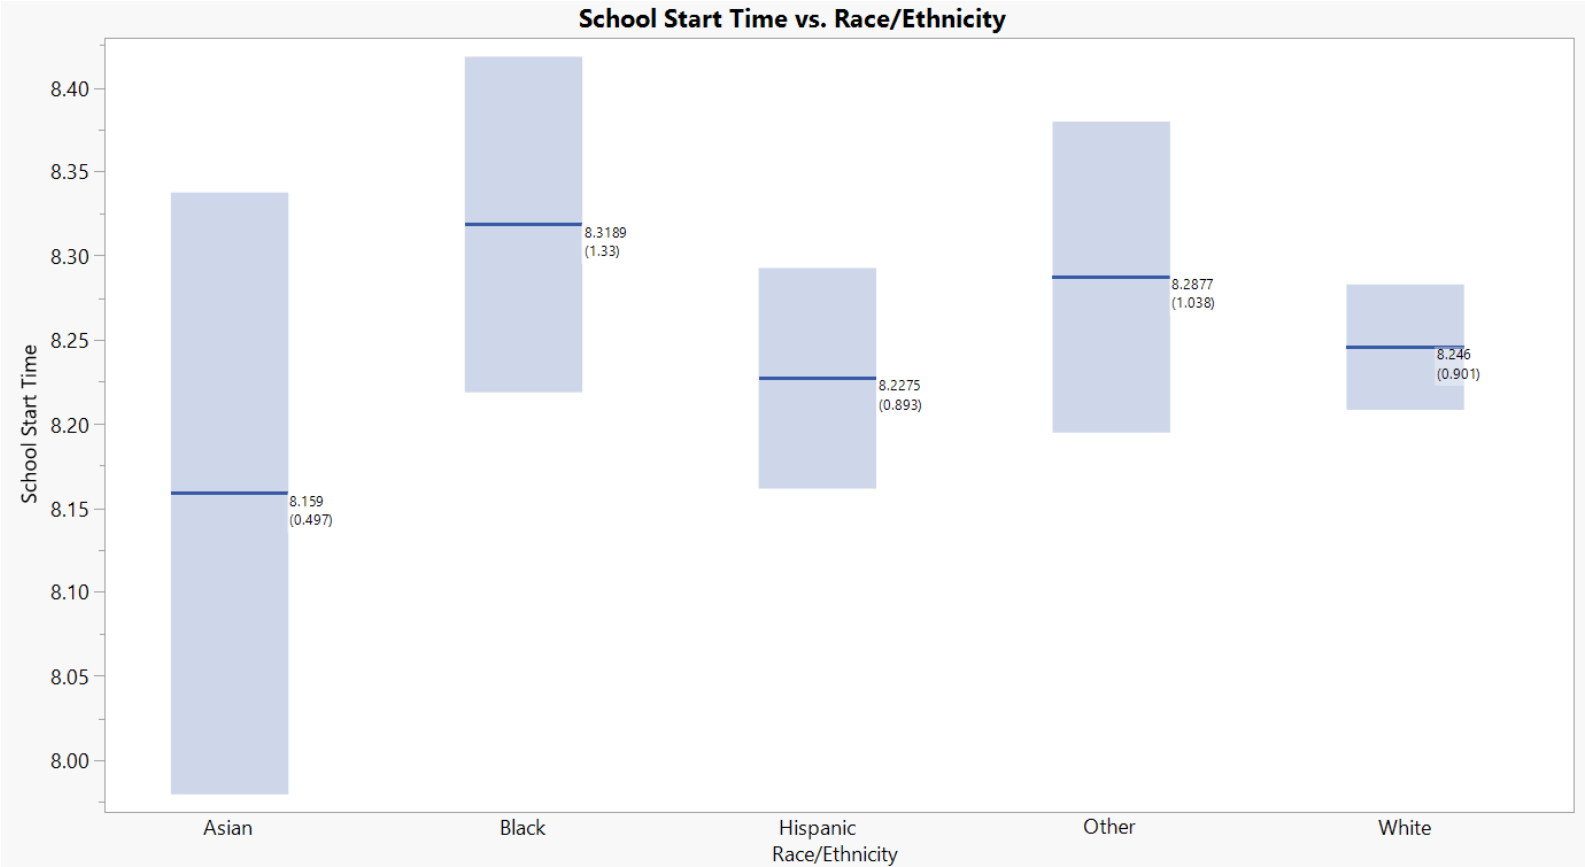

**Supplement Figure 7:** School Start times by Race/Ethnic Categories

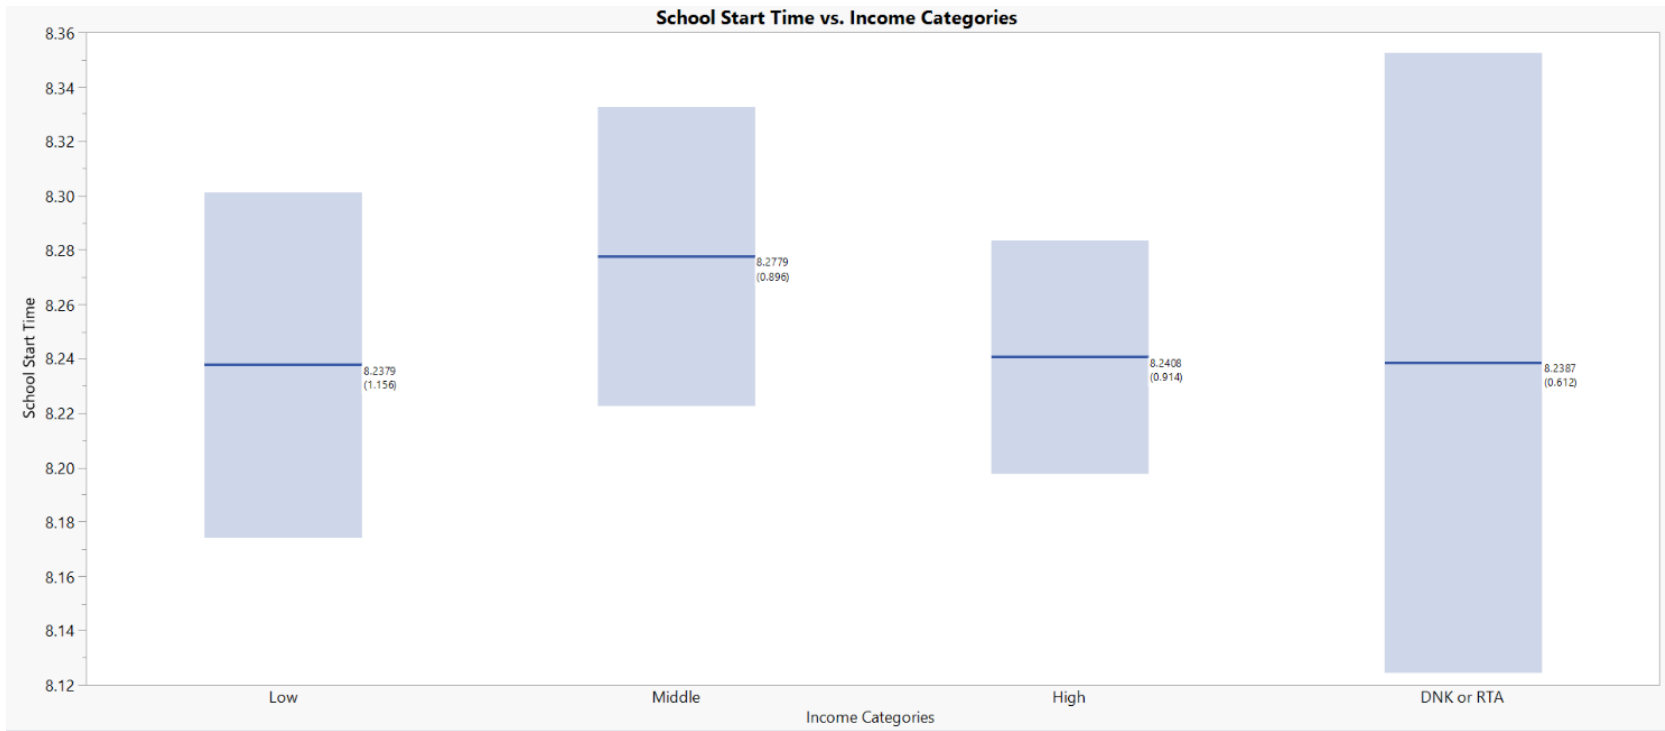

**Supplement Figure 8:** School Start times by Income Categories
